# Supplementary material
Source: HighWire-hosted journal article supplement (https://emj.bmj.com/content/39/7/508)
Supplement: inline-supplementary-material-1 [file inline-supplementary-material-1.pdf]

## Appendix 1: Diagnosis categories, admission location and common diagnoses.

| Primary Reason for Admission ICD10 Code Chapter                                        | Number of distinct codes per chapter |
|----------------------------------------------------------------------------------------|--------------------------------------|
| Certain infectious and parasitic diseases                                              | 57                                   |
| Neoplasms                                                                              | 14                                   |
| Diseases of the blood                                                                  | 14                                   |
| Endocrine, nutritional and metabolic disease                                           | 30                                   |
| Mental and Behavioural Disorders                                                       | 26                                   |
| Diseases of the Nervous System                                                         | 40                                   |
| Diseases of Eye and Adnexa/ Diseases of Ear and Mastoid Process                        | 7                                    |
| Diseases of the Circulatory System                                                     | 64                                   |
| Diseases of the Respiratory System                                                     | 83                                   |
| Diseases of the Digestive System                                                       | 126                                  |
| Diseases of the Skin and Subcutaneous Tissue                                           | 23                                   |
| Diseases of the musculoskeletal system and connective tissue                           | 61                                   |
| Diseases of the genitourinary system                                                   | 45                                   |
| Pregnancy, childbirth and puerperium                                                   | 18                                   |
| Congenital malformations, deformations and chromosomal abnormalities                   | 4                                    |
| Symptoms, signs and abnormal clinical and laboratory findings not elsewhere classified | 82                                   |
| Injury, poisoning and certain other consequences of external causes                    | 131                                  |
| Factors influencing health status and contact with health services                     | 9                                    |
| Acute Admission Specialty                                                              | Number (%)                           |
| General Medicine                                                                       | 5729 (62.1)                          |
| General Surgery                                                                        | 2087 (22.6)                          |
| A&E                                                                                    | 285 (3.1)                            |
| Gynaecology                                                                            | 189 (2.0)                            |
| ENT                                                                                    | 170 (1.8)                            |
| Respiratory Medicine                                                                   | 146 (1.6)                            |
| Cardiology                                                                             | 144 (1.6)                            |
| Paediatrics                                                                            | 135 (1.5)                            |
| Top 10 ICD 10 codes of patients admitted to Critical Care (ICU/HDU/ Coronary care)     | Number (%) <sup>a</sup>              |
| E101 Type 1 diabetes Mellitus with ketoacidosis                                        | 99 (36.5)                            |
| J459 Asthma unspecified                                                                | 50 (18.5)                            |
| R074 Chest pain, unspecified                                                           | 28 (10.3)                            |
| J189 Pneumonia, unspecified                                                            | 20 (7.4)                             |
| I319 Disease of pericardium, unspecified                                               | 15 (5.5)                             |
| J46 Status asthmaticus                                                                 | 13 (4.8)                             |
| I309 Acute pericarditis unspecified                                                    | 12 (4.4)                             |
| J181 Lobar pneumonia unspecified                                                       | 12 (4.4)                             |
| R073 Other chest pain                                                                  | 12 (4.4)                             |
| I219 Acute myocardial infarction unspecified                                           | 10 (3.8)                             |

a. Percentage of patients admitted to critical care
