# Supplementary material
Source: HighWire-hosted journal article supplement (https://emj.bmj.com/content/39/7/508)
Supplement: inline-supplementary-material-2 [file inline-supplementary-material-2.pdf]

Appendix 2: Cause of death for deaths occurring within 7 days of end of an unscheduled care episode starting with an NHS 24 call.

| Cause of death for deaths occurring within 7 days of Continuous Unscheduled Care Pathway ending. |                                       | Total Number |
|--------------------------------------------------------------------------------------------------|---------------------------------------|--------------|
| Men                                                                                              | NHS 24 Disposition                    |              |
| Multi-organ failure                                                                              | Ambulance/1 hour GP HV/2-hour PCOOH   | 3            |
| Unascertained pending investigation                                                              | Scheduled/2-hour PCOOH appointment    | 2            |
| Acute myocardial infarction                                                                      | Ambulance                             | 1            |
| Ascending aorta pseudoaneurysm                                                                   | Ambulance                             | 1            |
| Bronchopneumonia                                                                                 | 4-hour PCOOH appointment              | 1            |
| Cardiac failure                                                                                  | Scheduled appointment                 | 1            |
| Ischaemic heart disease                                                                          | Ambulance                             | 1            |
| Metastatic oesophageal cancer                                                                    | 2-hour GP HV                          | 1            |
| Women                                                                                            | NHS 24 Disposition                    |              |
| Carcinomatosis                                                                                   | 1-hour PCOOH appointment/1 hour GP HV | 2            |
| Decompensated liver cirrhosis                                                                    | 4-hour PCOOH appointment              | 1            |
| Decompensated liver disease                                                                      | 4-hour PCOOH appointment              | 1            |
| Metastatic synovial sarcoma with lung metastasis                                                 | Ambulance                             | 1            |
| Multi-organ failure                                                                              | 1-hour PCOOH appointment              | 1            |
| Pneumonitis secondary to unknown cause                                                           | Ambulance                             | 1            |
| Pulmonary oedema                                                                                 | 4-hour PCOOH appointment              | 1            |
| Pulmonary thromboembolism                                                                        | 2-hour PCOOH appointment              | 1            |
| Septic shock syndrome                                                                            | 2-hour GP HV                          | 1            |
| Subdural haemorrhage                                                                             | 1-hour PCOOH appointment              | 1            |
| Type 2 respiratory failure                                                                       | Ambulance                             | 1            |
| Unascertained pending investigation                                                              | 4-hour GP HV                          | 1            |

PCOOH: Primary care out of hours. GP HV: General practitioner home visit.
