# Supplementary material
Source: HighWire-hosted journal article supplement (https://emj.bmj.com/content/39/7/508)
Supplement: inline-supplementary-material-3 [file inline-supplementary-material-3.pdf]

## Appendix 3

Table 1. NHS 24 call outcome recommendation

| NHS 24 Disposition | Second Unscheduled Care Service Contacted after NHS 24 Call |                |                |                |                |                            |
|--------------------|-------------------------------------------------------------|----------------|----------------|----------------|----------------|----------------------------|
|                    | Direct Inpatient Admission                                  | NHS 24         | ED             | GP OOH         | Ambulance      | No contact within 24 hours |
|                    | Number (row %)                                              | Number (row %) | Number (row %) | Number (row %) | Number (row %) | Number (row %)             |
| Ambulance          | 4 (0)                                                       | 388 (3.3)      | 563 (4.8)      | 189 (1.6)      | 10283 (87.5)   | 331 (2.8)                  |
| ED                 | 9 (0.1)                                                     | 211 (3.5)      | 4878 (80.1)    | 115 (1.9)      | 187 (3.1)      | 691 (11.3)                 |
| 1HV                | 0 (0)                                                       | 7 (5.4)        | 3 (2.3)        | 110 (84.6)     | 9 (6.9)        | 1 (0.8)                    |
| 2HV                | 1 (0.2)                                                     | 34 (6.8)       | 3 (0.6)        | 423 (84.9)     | 33 (6.6)       | 4 (0.8)                    |
| 4HV                | 1 (0.1)                                                     | 65 (7)         | 5 (0.5)        | 793 (85.5)     | 51 (5.5)       | 13 (1.4)                   |
| 1OOH               | 0 (0)                                                       | 270 (4.7)      | 192 (3.4)      | 4977 (87.4)    | 181 (3.2)      | 77 (1.4)                   |
| 2OOH               | 2 (0)                                                       | 316 (3.8)      | 257 (3.1)      | 7489 (89.3)    | 154 (1.8)      | 172 (2.1)                  |
| 4OOH               | 5 (0)                                                       | 1431 (3.8)     | 947 (2.5)      | 34102 (89.8)   | 318 (0.8)      | 1173 (3.1)                 |
| SCHEDULE           | 107 (0.6)                                                   | 2397 (13.5)    | 1476 (8.3)     | 736 (4.2)      | 745 (4.2)      | 12235 (69.1)               |
| SELF CARE          | 4 (0)                                                       | 345 (4.1)      | 307 (3.6)      | 192 (2.3)      | 51 (0.6)       | 7554 (89.4)                |
| Missing            | 21 (0.4)                                                    | 725 (13.9)     | 1009 (19.4)    | 922 (17.7)     | 396 (7.6)      | 2127 (40.9)                |

Table 2. Days of the week on which NHS24 calls were made<sup>1</sup>.

| Days on which calls made | Number (%) |
|--------------------------|------------|
| Monday                   | 14484 (14) |
| Tuesday                  | 11936 (12) |
| Wednesday                | 11797 (11) |
| Thursday                 | 11202 (11) |
| Friday                   | 10912 (11) |
| Saturday                 | 20300 (20) |
| Sunday                   | 22191 (22) |
| Total                    | 102822     |

<sup>1</sup> Monday to Friday 8am – 6pm calls taken by GP Practices.

Table 3. Sensitivity, specificity, and predictive values of NHS 24 disposition.

|                                                            | Patient not admitted | Patient admitted | Sensitivity= 89.8%<br>Specificity= 28.4%<br>PPV = 10.9%<br>NPV = 96.6% |
|------------------------------------------------------------|----------------------|------------------|------------------------------------------------------------------------|
| NHS24 referral to other service: ED, ambulance, PCOOH, HV. | 63657                | 7811             |                                                                        |
| NHS24 does not refer: self-care and scheduled appointment. | 25267                | 884              |                                                                        |
